# Supplementary material for: Biomimetic Synthesis of Resveratrol Trimers Catalyzed by Horseradish Peroxidase
Source: MDPI journal article supplement (doi:10.3390/molecules22050819), 2017-05-17
Supplement: s1 [file s1]

**Supplementary data**  
**Biomimetic Synthesis of Resveratrol Trimers Catalyzed by Horseradish Peroxidase**

**Jian-Qiao Zhang <sup>1</sup>, Gan-Peng Li <sup>2</sup>, Yu-Long Kang <sup>1</sup>, Bin-Hao Teng <sup>1</sup> and Chun-Suo Yao<sup>1,\*</sup>**

**CONTENTS**

- S1. <sup>1</sup>H-NMR spectrum of compound **3** in CD<sub>3</sub>COCD<sub>3</sub>.
- S2. <sup>13</sup>C-NMR spectrum of compound **3** in CD<sub>3</sub>COCD<sub>3</sub>.
- S3. DEPT spectrum of compound **3** in CD<sub>3</sub>COCD<sub>3</sub>.
- S4. HSQC spectrum of compound **3** in CD<sub>3</sub>COCD<sub>3</sub>.
- S5. HMBC spectrum of compound **3** in CD<sub>3</sub>COCD<sub>3</sub>.
- S6. NOESY spectrum of compound **3** in CD<sub>3</sub>COCD<sub>3</sub>.
- S7. HRESIMS spectrum of compound **3**.
- S8. UV spectrum of compound **3** in CH<sub>3</sub>OH.
- S9. IR spectrum of compound **3**.
- S10. <sup>1</sup>H-NMR spectrum of compound **4** in CD<sub>3</sub>OD.
- S11. <sup>13</sup>C-NMR spectrum of compound **4** in CD<sub>3</sub>OD.
- S12. DEPT spectrum of compound **4** in CD<sub>3</sub>OD.
- S13. HSQC spectrum of compound **4** in CD<sub>3</sub>OD.
- S14. HMBC spectrum of compound **4** in CD<sub>3</sub>OD.
- S15. NOESY spectrum of compound **4** in CD<sub>3</sub>OD.
- S16. COSY spectrum of compound **4** in CD<sub>3</sub>OD.
- S17. HRESIMS spectrum of compound **4**.
- S18. UV spectrum of compound **4** in CH<sub>3</sub>OH.
- S19. IR spectrum of compound **4**.
- S20. <sup>1</sup>H-NMR spectrum of compound **5** in CD<sub>3</sub>COCD<sub>3</sub>.
- S21. <sup>13</sup>C-NMR spectrum of compound **5** in CD<sub>3</sub>COCD<sub>3</sub>.
- S22. DEPT spectrum of compound **5** in CD<sub>3</sub>COCD<sub>3</sub>.
- S23. HSQC spectrum of compound **5** in CD<sub>3</sub>COCD<sub>3</sub>.
- S24. HMBC spectrum of compound **5** in CD<sub>3</sub>COCD<sub>3</sub>.
- S25. NOESY spectrum of compound **5** in CD<sub>3</sub>COCD<sub>3</sub>.
- S26. COSY spectrum of compound **5** in CD<sub>3</sub>COCD<sub>3</sub>.
- S27. HRESIMS spectrum of compound **5**.
- S28. UV spectrum of compound **5** in CH<sub>3</sub>OH.
- S29. IR spectrum of compound **5**.
- S30. HPLC chromatogram of biotransformation products of **1** and **2**.

S1.  $^1\text{H}$ -NMR spectrum of compound **3** in  $\text{CD}_3\text{COCD}_3$ .

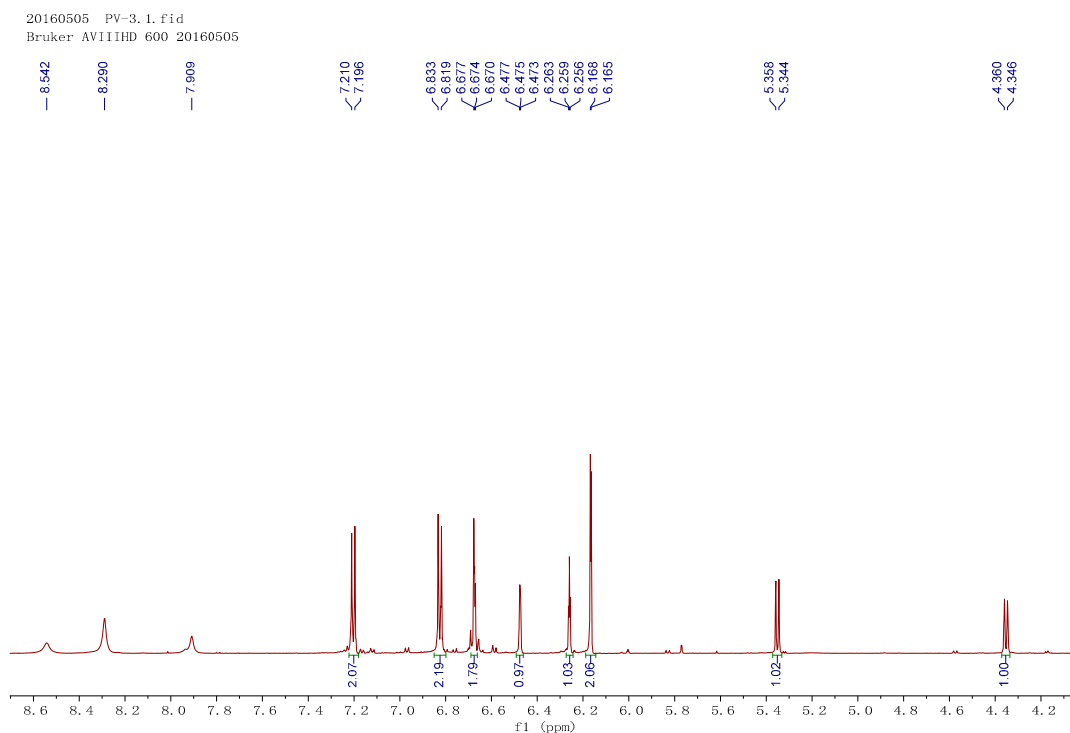

S2.  $^{13}\text{C}$ -NMR spectrum of compound **3** in  $\text{CD}_3\text{COCD}_3$ .

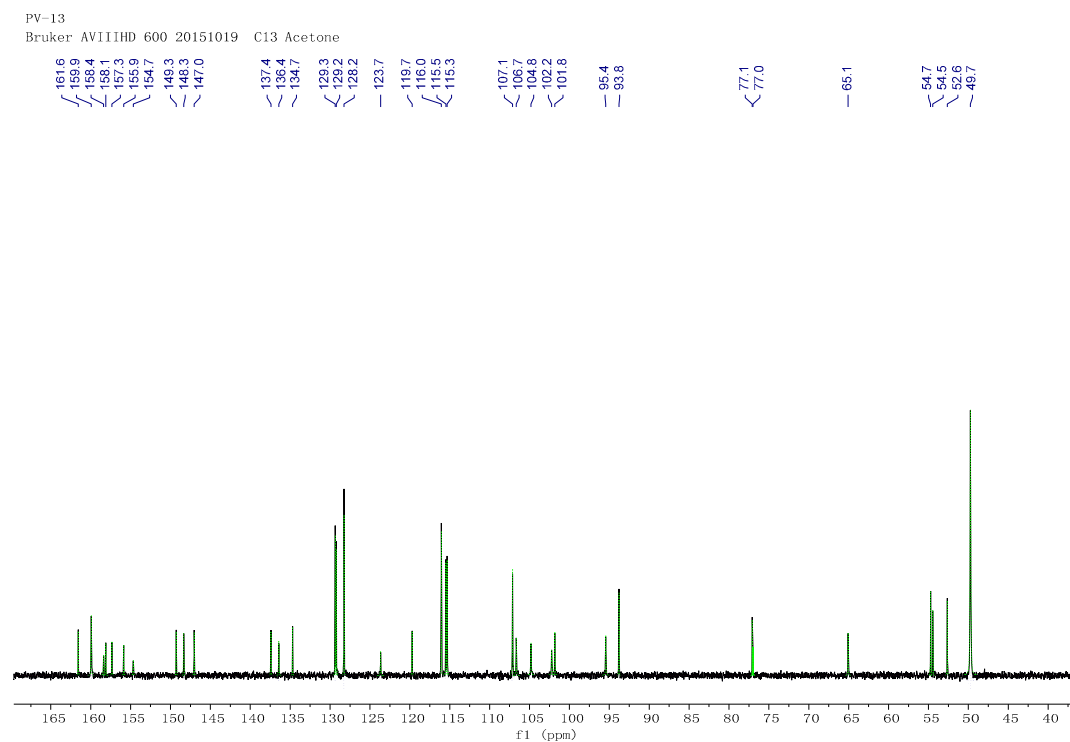

### S3. DEPT spectrum of compound **3** in CD<sub>3</sub>COCD<sub>3</sub>.

PV-13  
Bruker AVIIIHD 600 20151022 DEPT Acetone

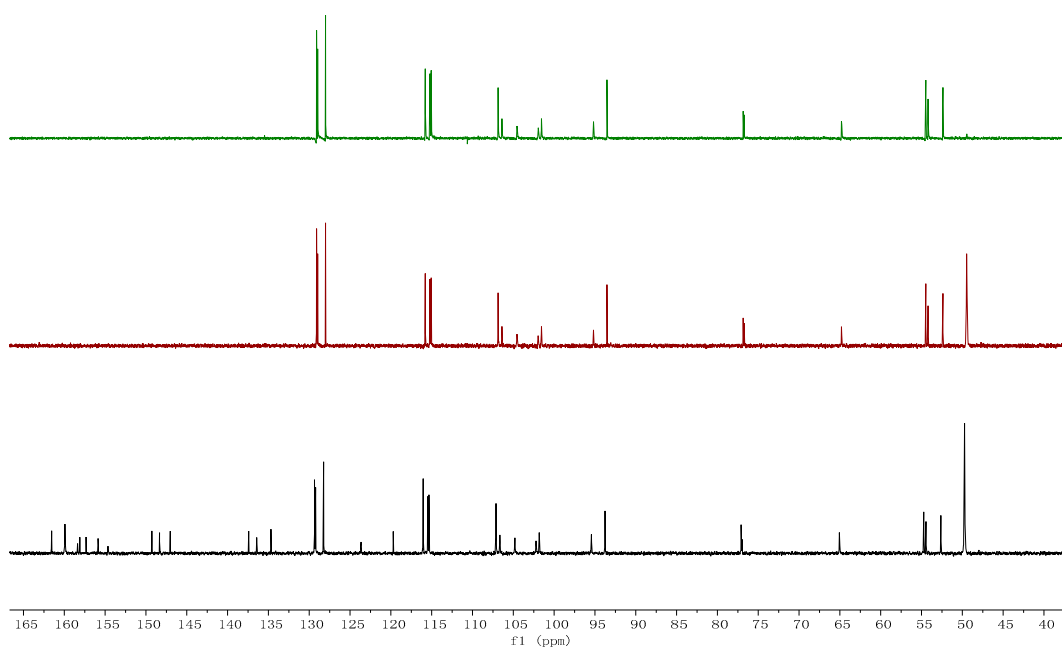

### S4. HSQC spectrum of compound **3** in CD<sub>3</sub>COCD<sub>3</sub>.

PV-13  
Bruker AVIIIHD 600 20151102 HSQC Acetone

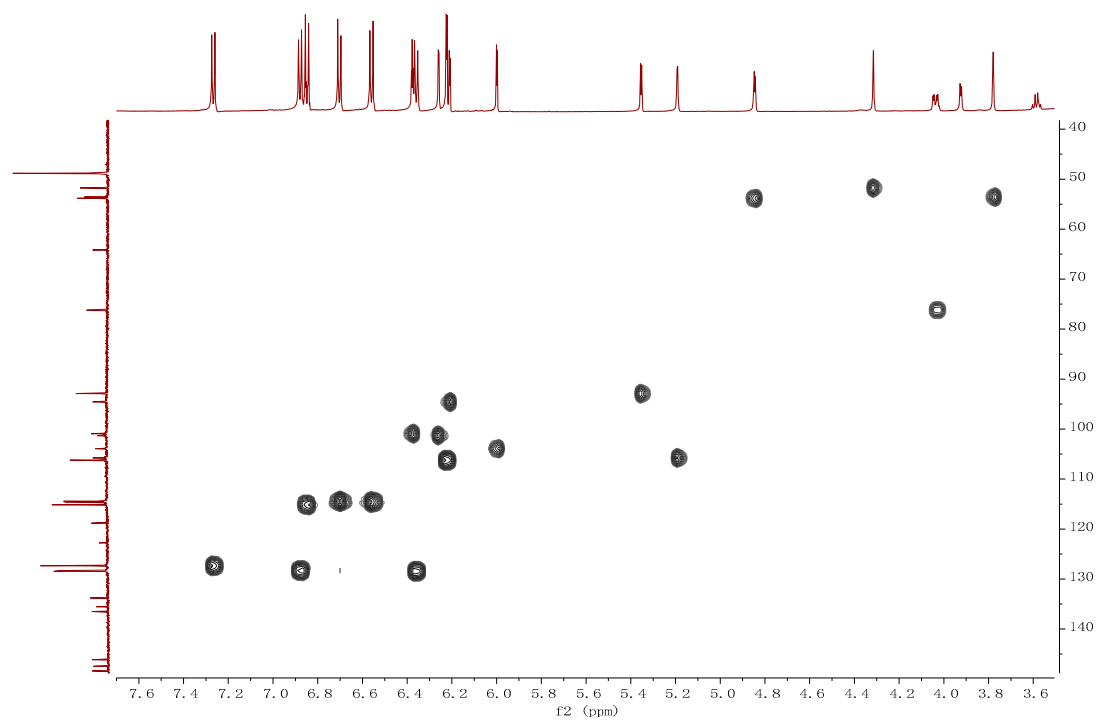

S5. HMBC spectrum of compound **3** in CD<sub>3</sub>COCD<sub>3</sub>.

PV-13  
Bruker AVIIIHD 600 20151102 HMBC Acetone

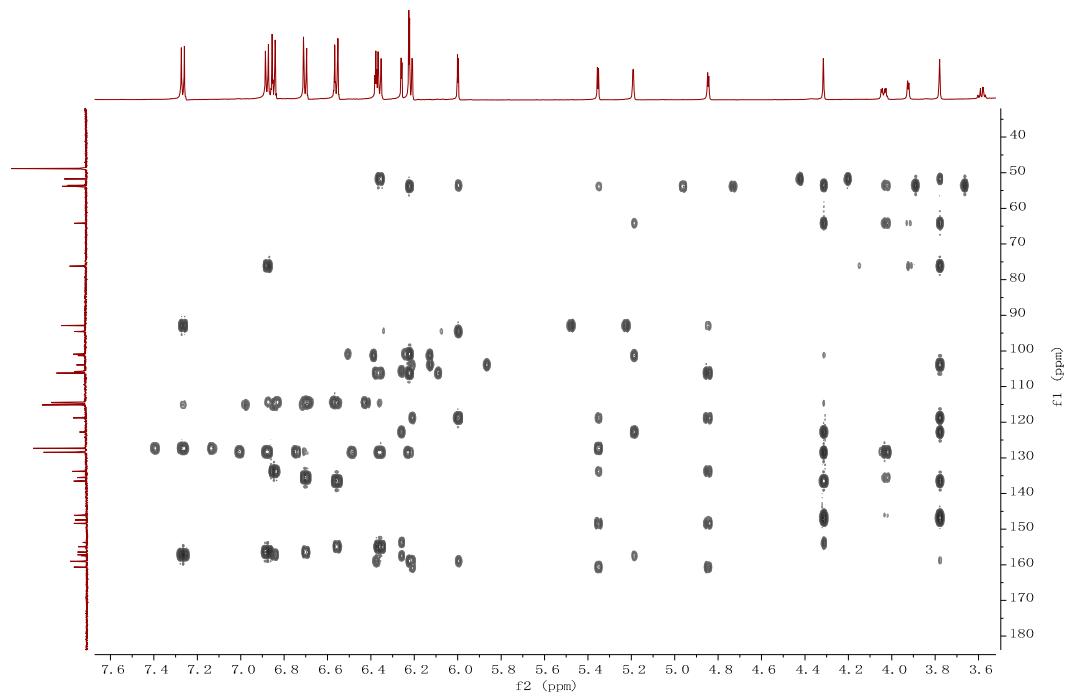

S6. NOESY spectrum of compound **3** in CD<sub>3</sub>COCD<sub>3</sub>.

PV-13  
Bruker AVIIIHD 600 20160505 NOESY\_2D Acetone

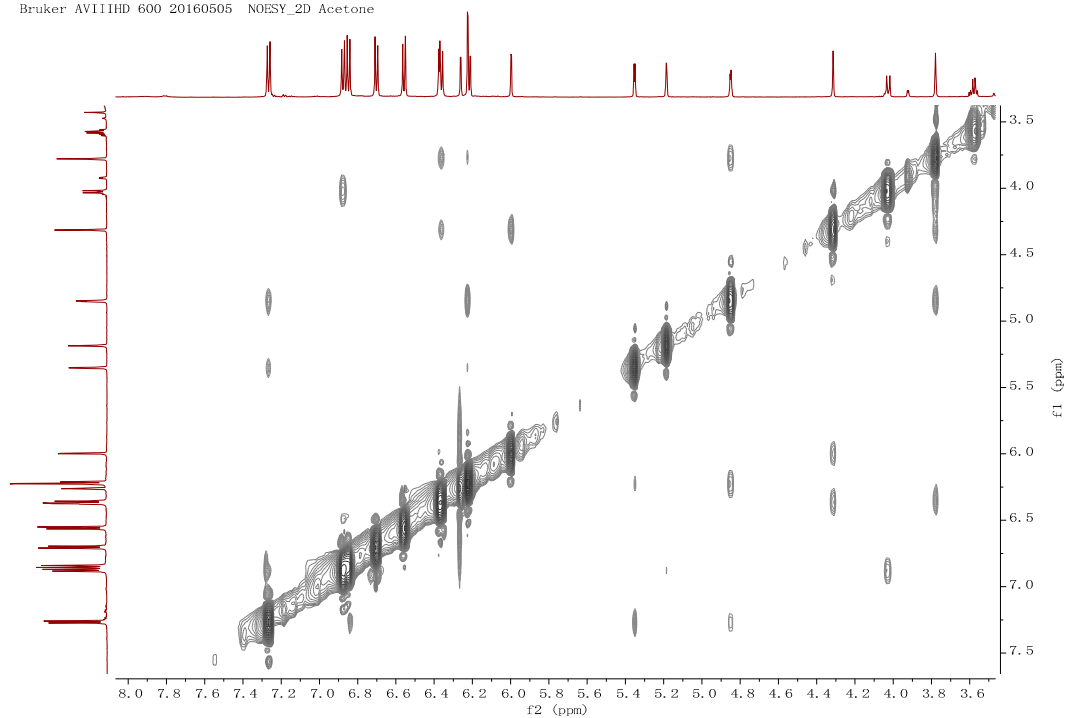

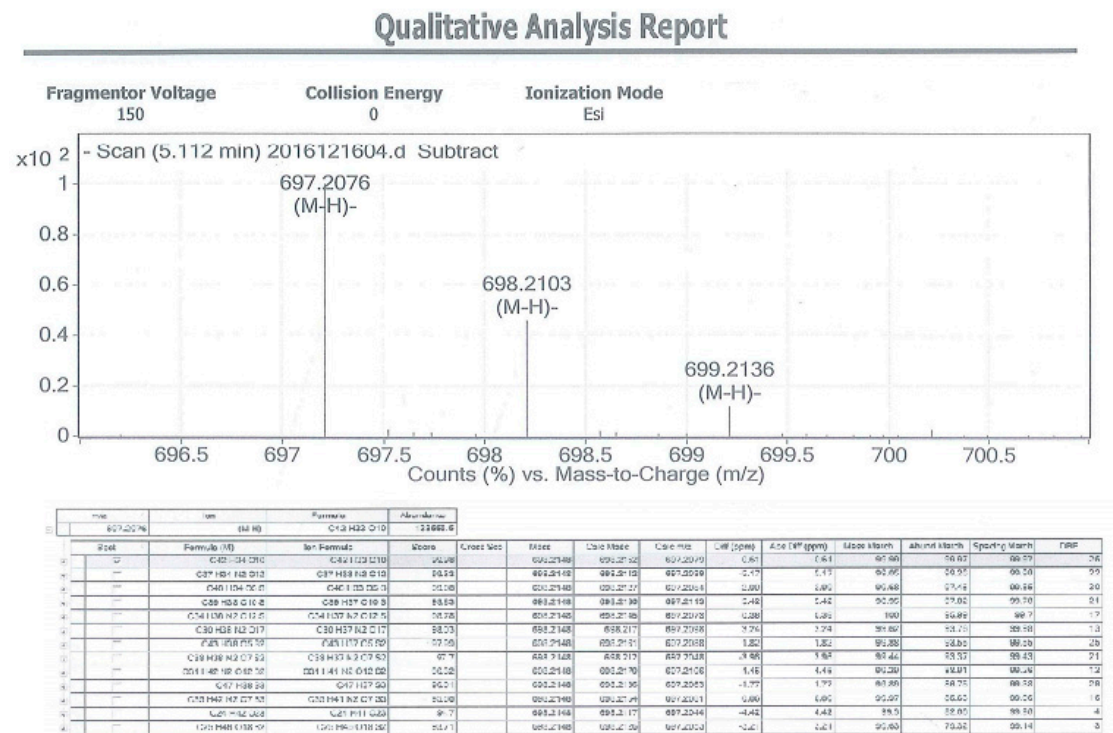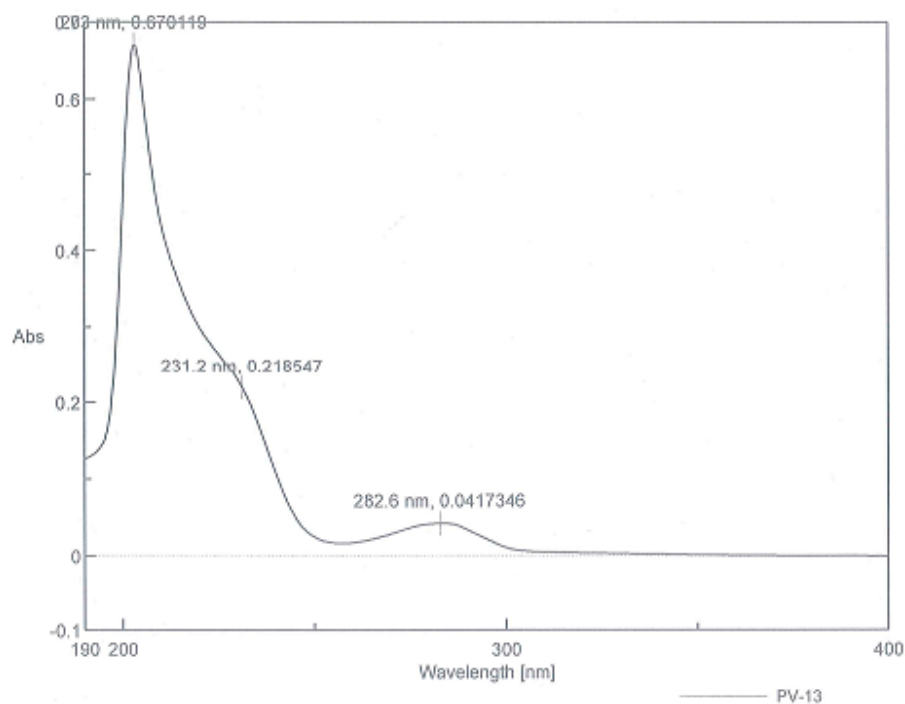

S9. IR spectrum of compound **3**.

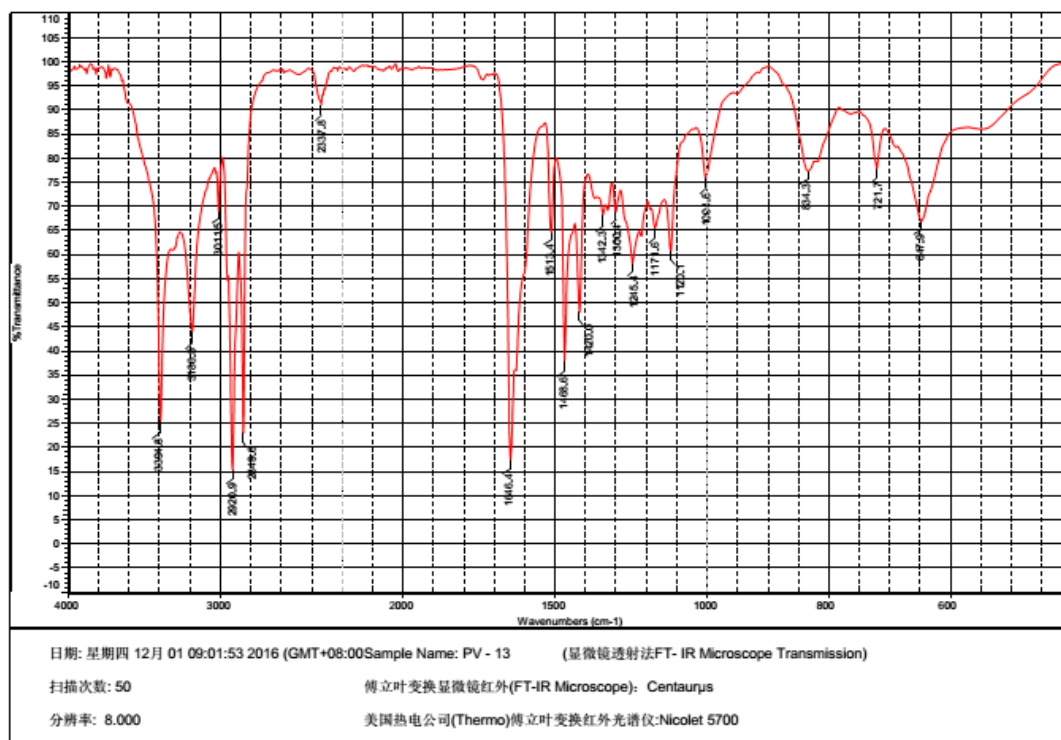

S10.  $^1\text{H}$ -NMR spectrum of compound **4** in  $\text{CD}_3\text{OD}$ .

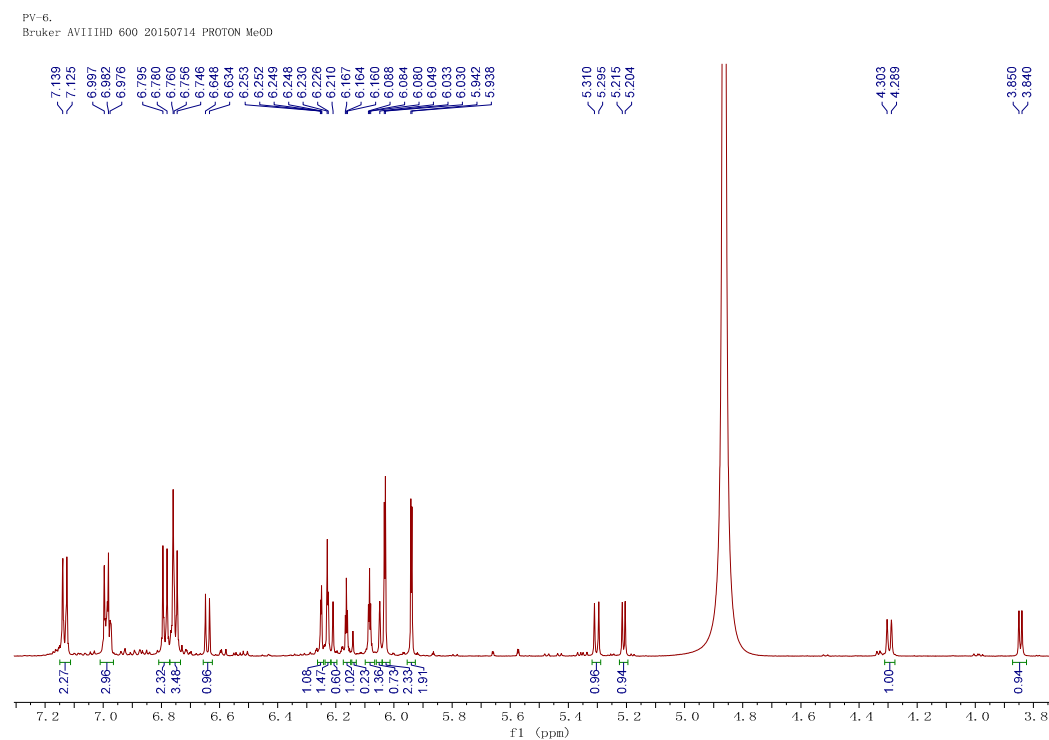

S11.  $^{13}\text{C}$ -NMR spectrum of compound **4** in  $\text{CD}_3\text{OD}$ .

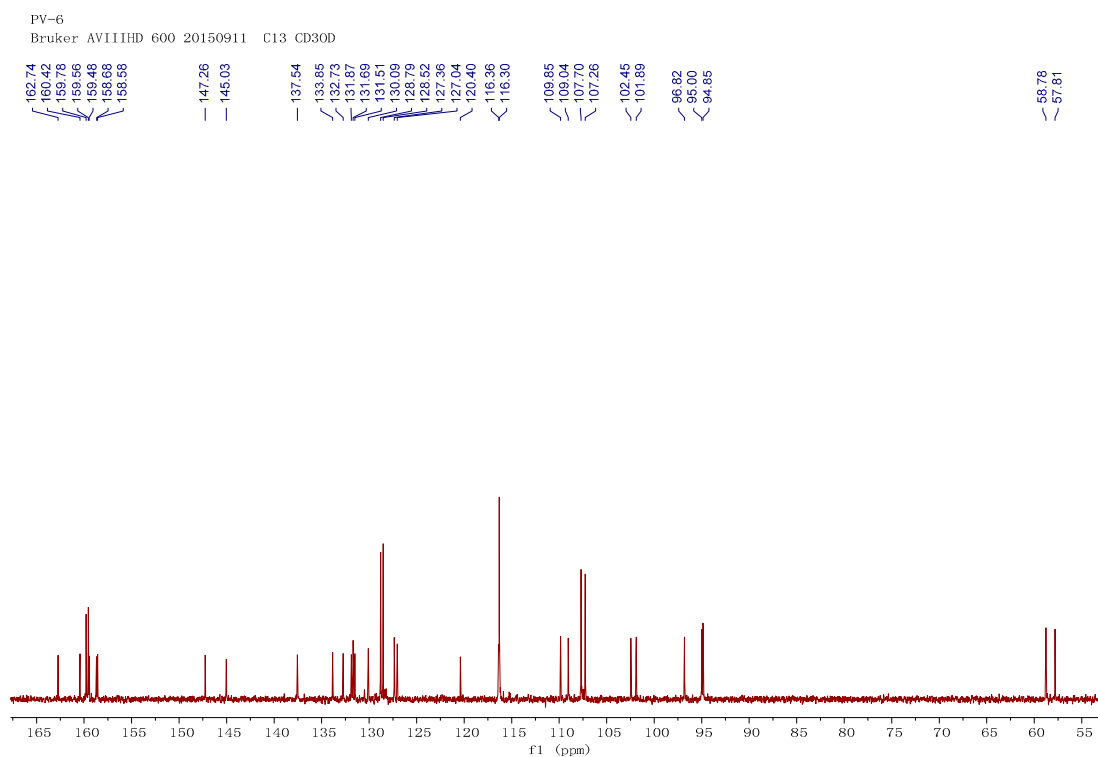

S12. DEPT spectrum of compound **4** in  $\text{CD}_3\text{OD}$ .

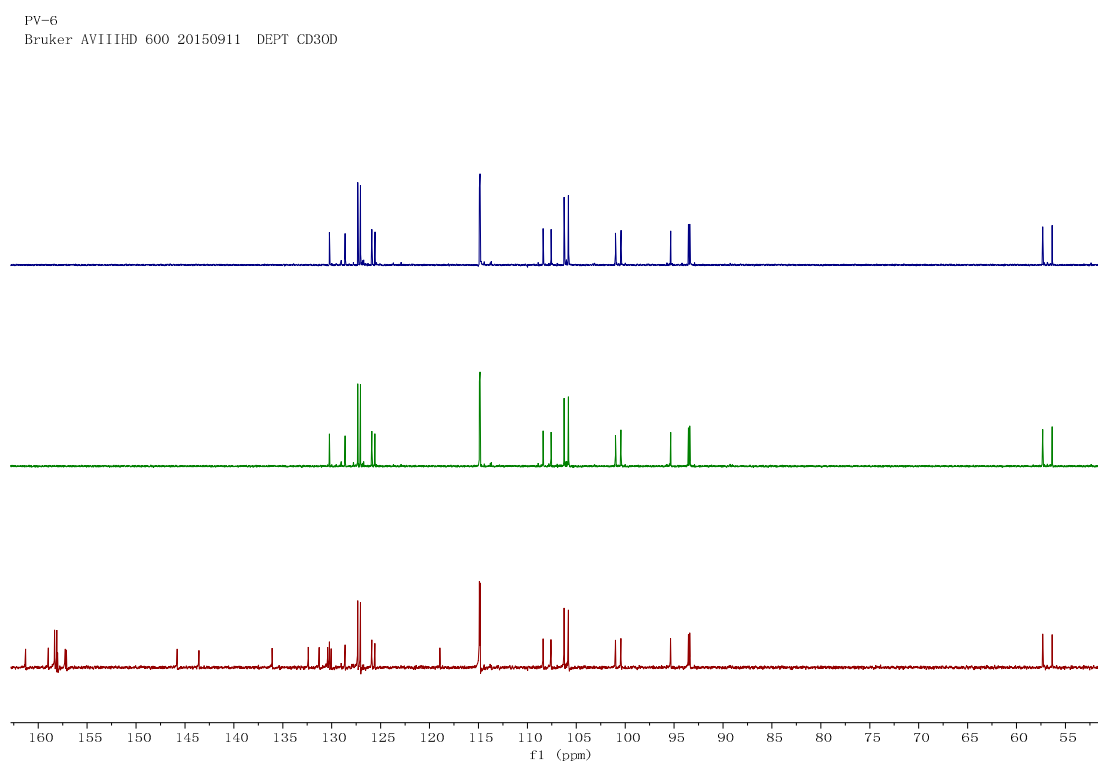

### S13. HSQC spectrum of compound **4** in CD<sub>3</sub>OD.

PV-6

Bruker AVIIIHD 600 20151109 HSQC CD3OD

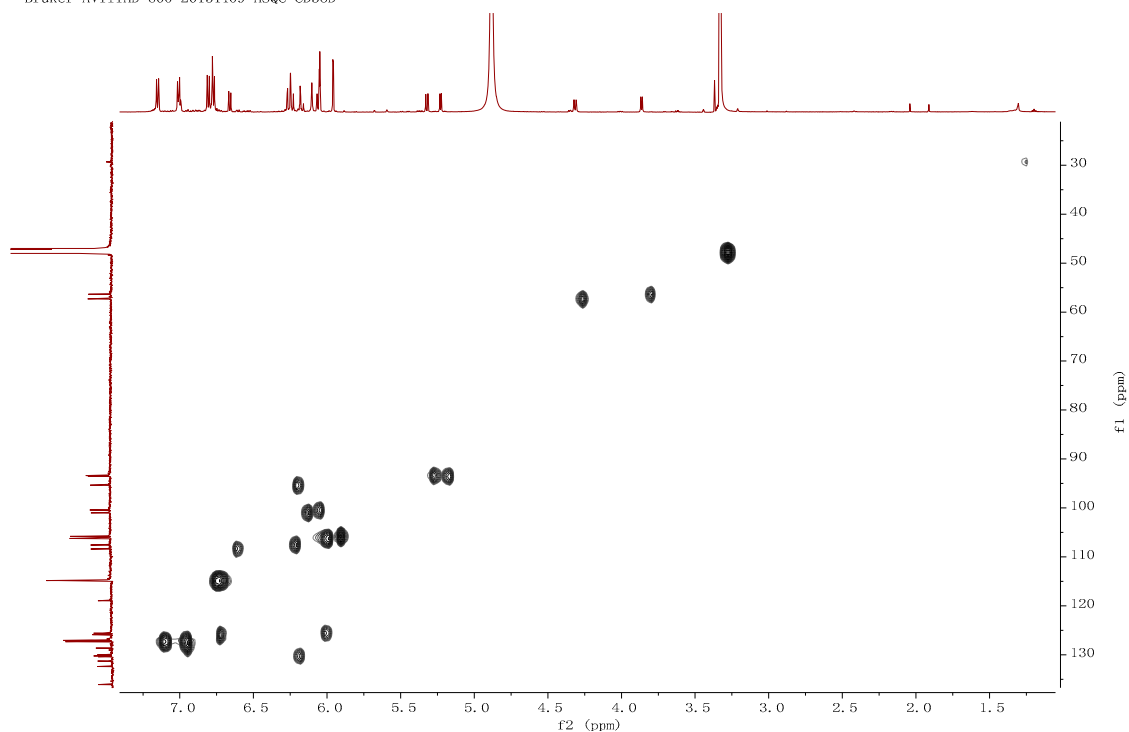

### S14. HMBC spectrum of compound **4** in CD<sub>3</sub>OD.

PV-6

Bruker AVIIIHD 600 20151109 HMBC CD3OD

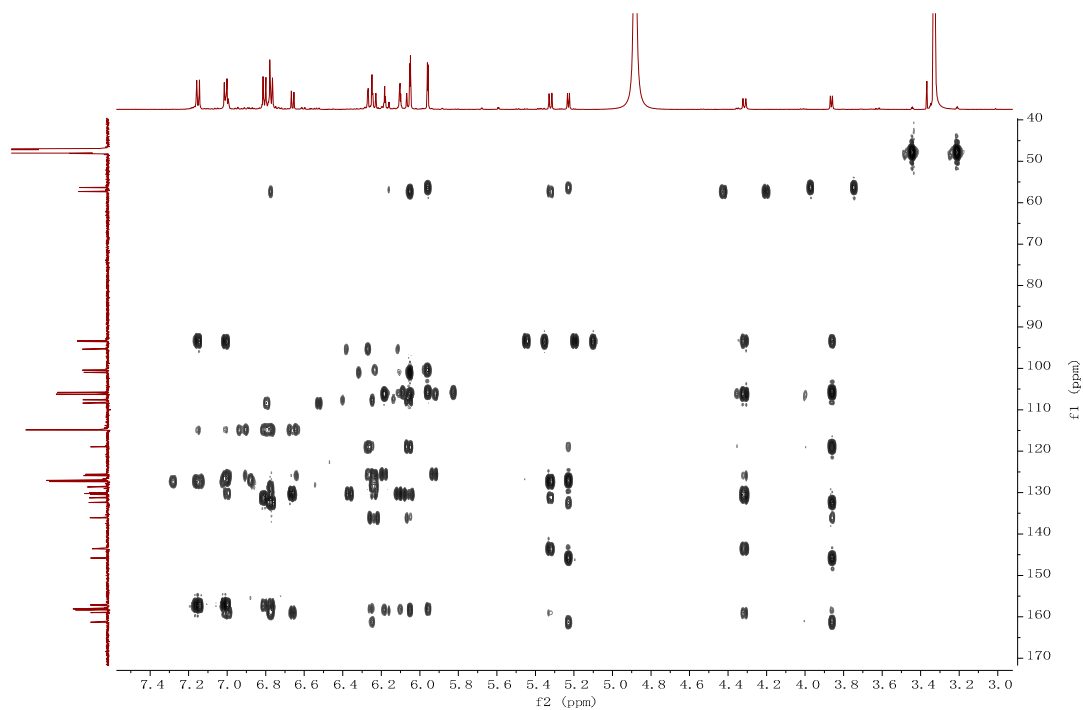



### S15. NOESY spectrum of compound **4** in CD<sub>3</sub>OD.

PV-6  
Bruker AVIIIHD 600 20151109 NOESY\_2D CD3OD

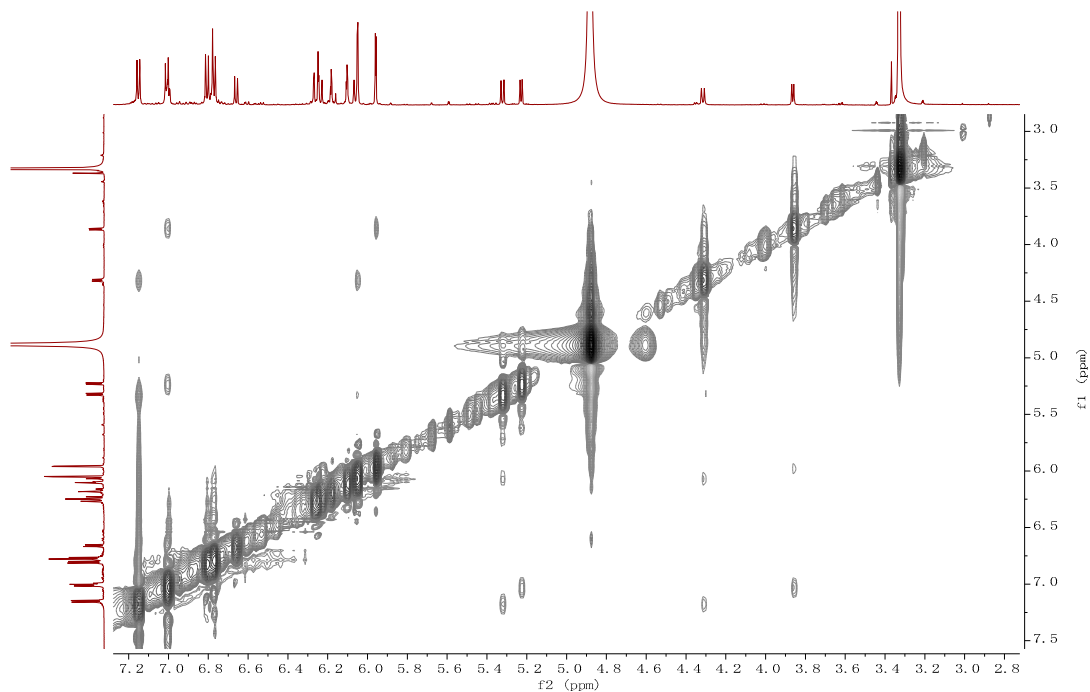

### S16. COSY spectrum of compound **4** in CD<sub>3</sub>OD

PV-6,  
Bruker AVIIIHD 600  
COSY\_MQF CD3OD

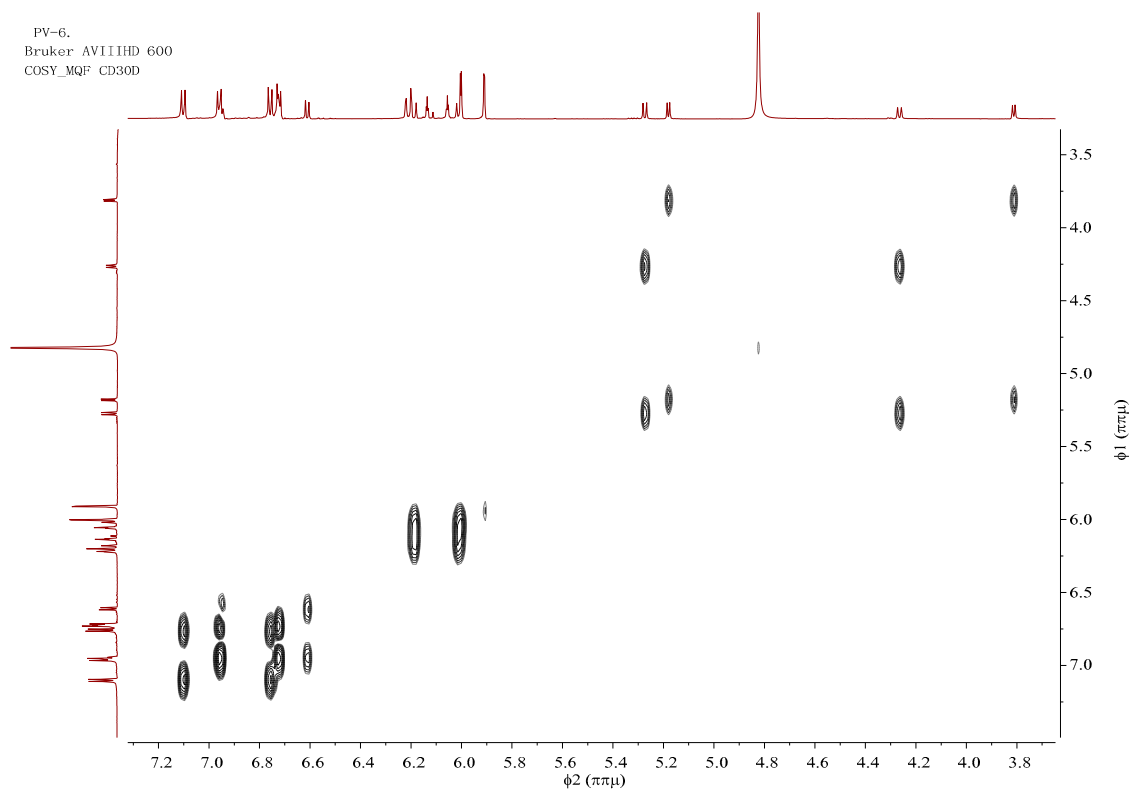

S17. HRESIMS spectrum of compound 4.

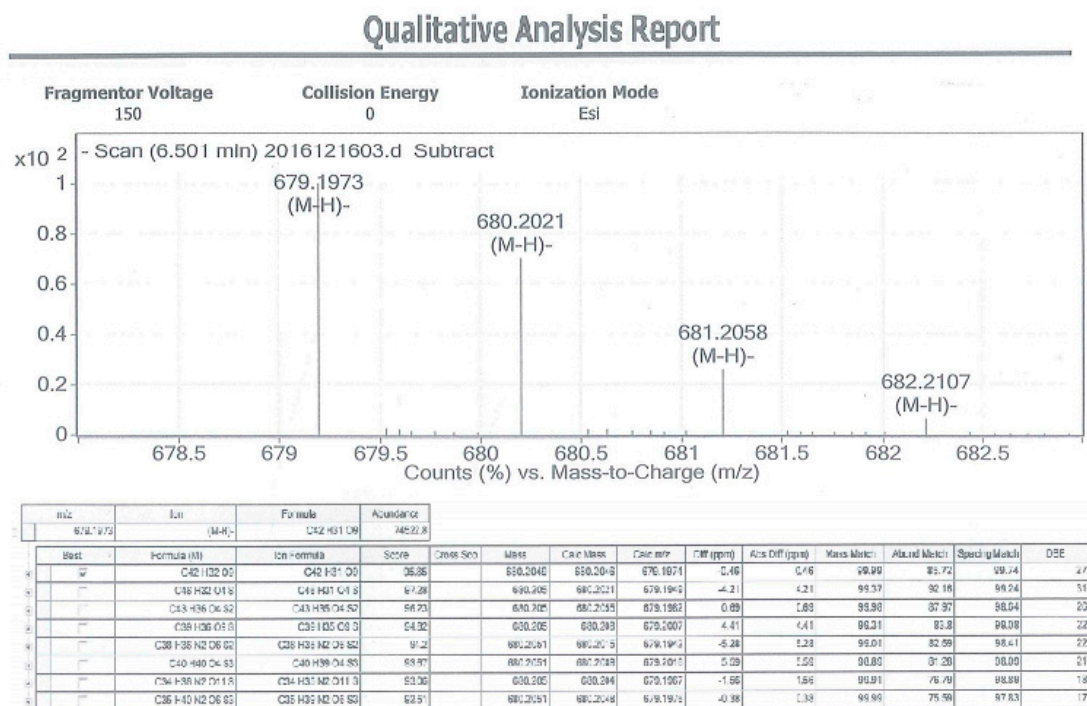

S18. UV spectrum of compound 4 in CH<sub>3</sub>OH.

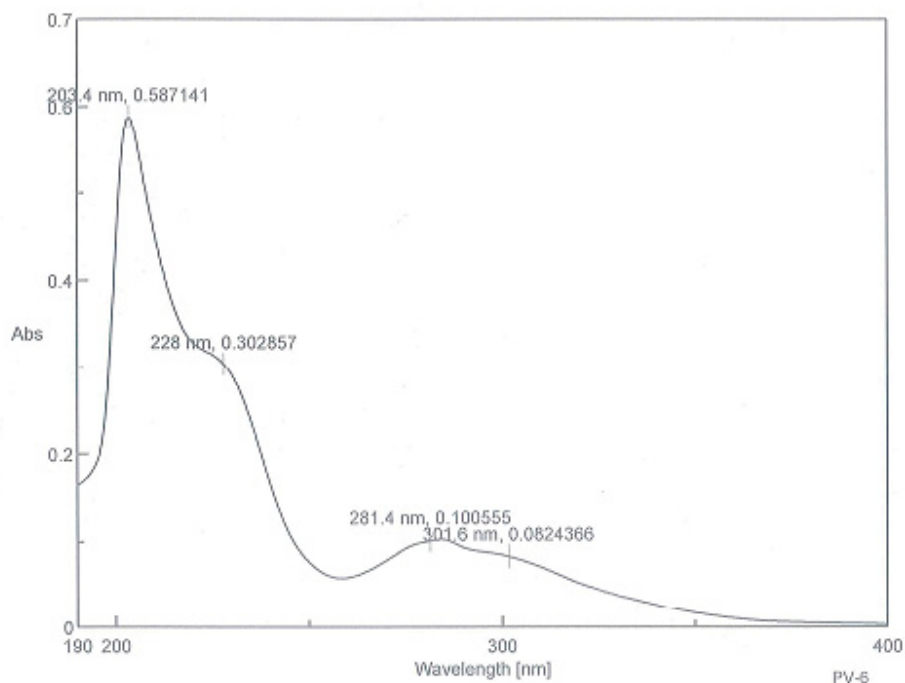

S19. IR spectrum of compound **4**.

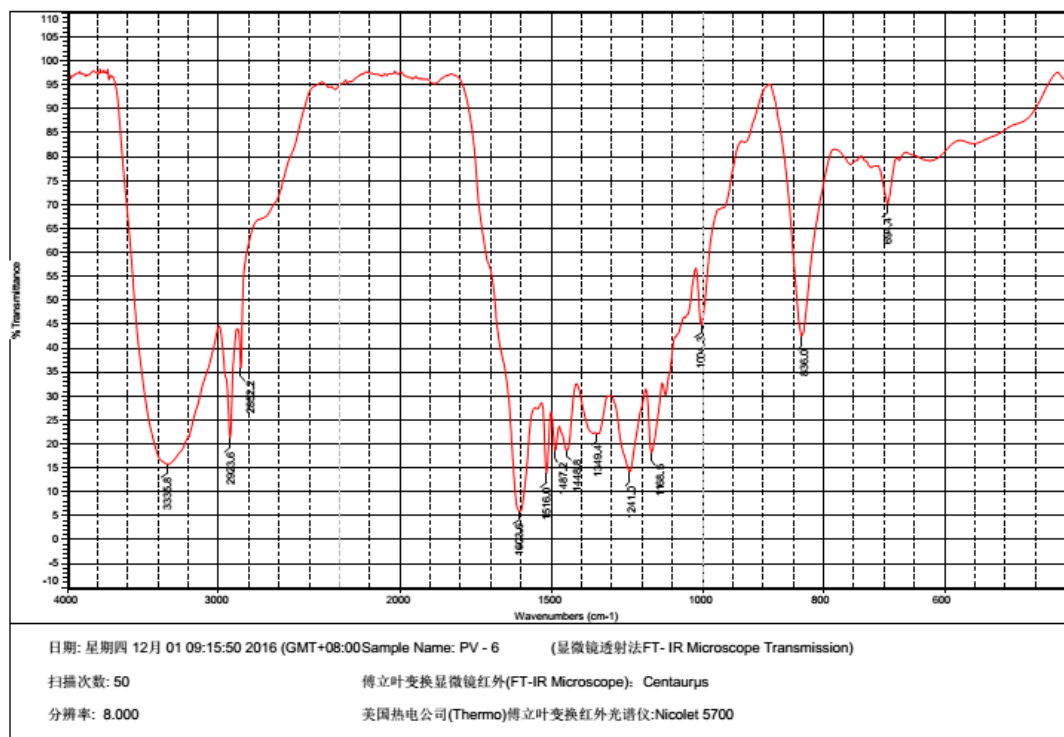

S20. <sup>1</sup>H-NMR spectrum of compound **5** in CD<sub>3</sub>COCD<sub>3</sub>.

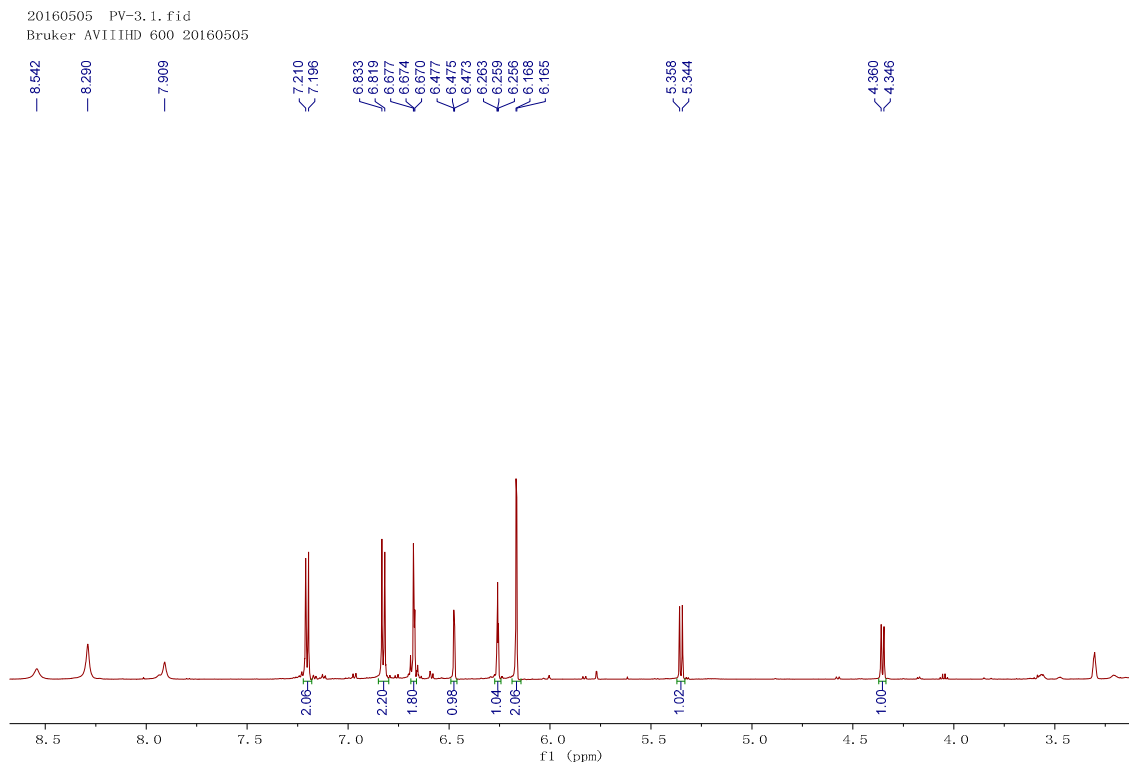

S21.  $^{13}\text{C}$ -NMR spectrum of compound **5** in  $\text{CD}_3\text{COCD}_3$ .

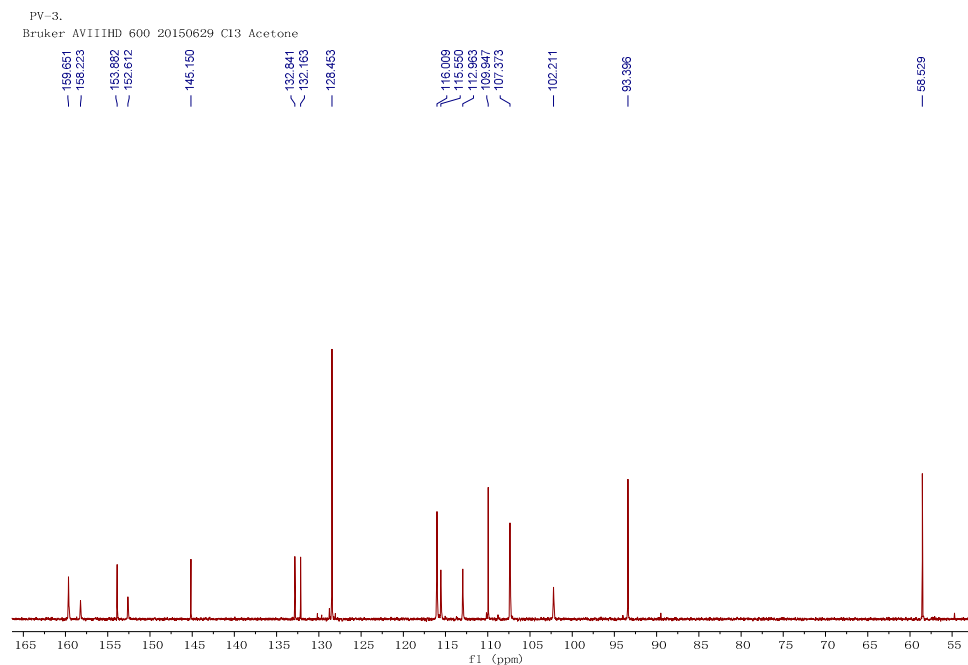

S22. DEPT spectrum of compound **5** in  $\text{CD}_3\text{COCD}_3$ .

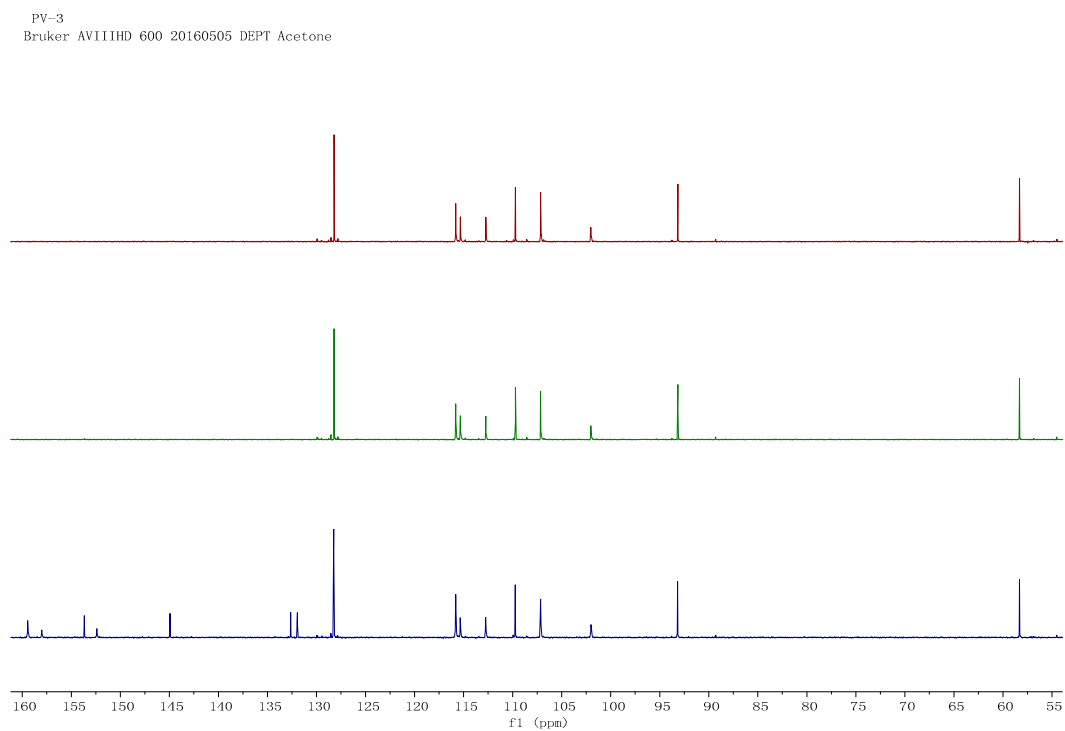

S23. HSQC spectrum of compound **5** in CD<sub>3</sub>COCD<sub>3</sub>.

PV-3.  
Bruker AVIIIHD 600 20160505 HSQC Acetone

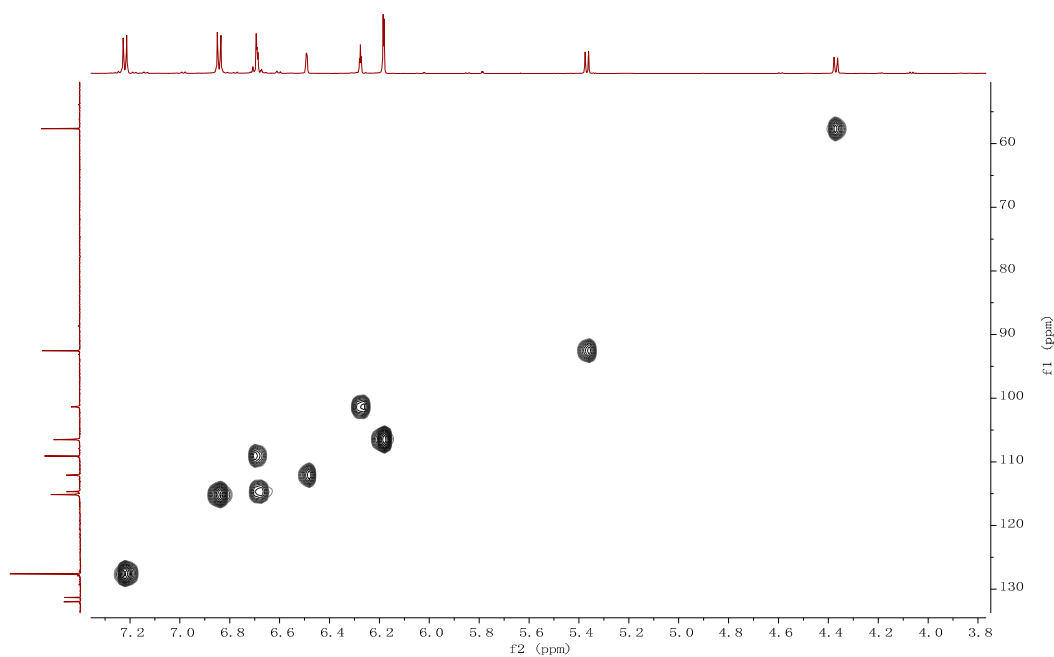

S24. HMBC spectrum of compound **5** in CD<sub>3</sub>COCD<sub>3</sub>.

PV-3.  
Bruker AVIIIHD 600 20160505 HMBC Acetone

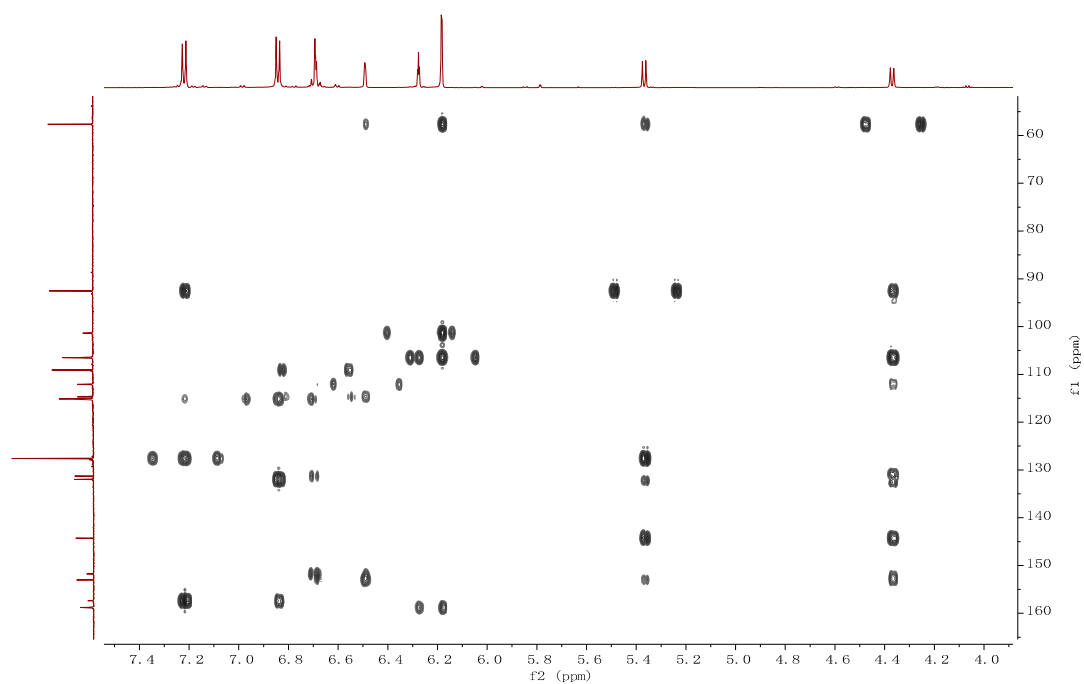

## S25. NOESY spectrum of compound **5** in CD<sub>3</sub>COCD<sub>3</sub>.

PV-3 NOE COSY. 3. ser  
 Bruker AVIIIHD 600 20170303  
 NOESY\_2D Acetone D:\ DATA2017 22

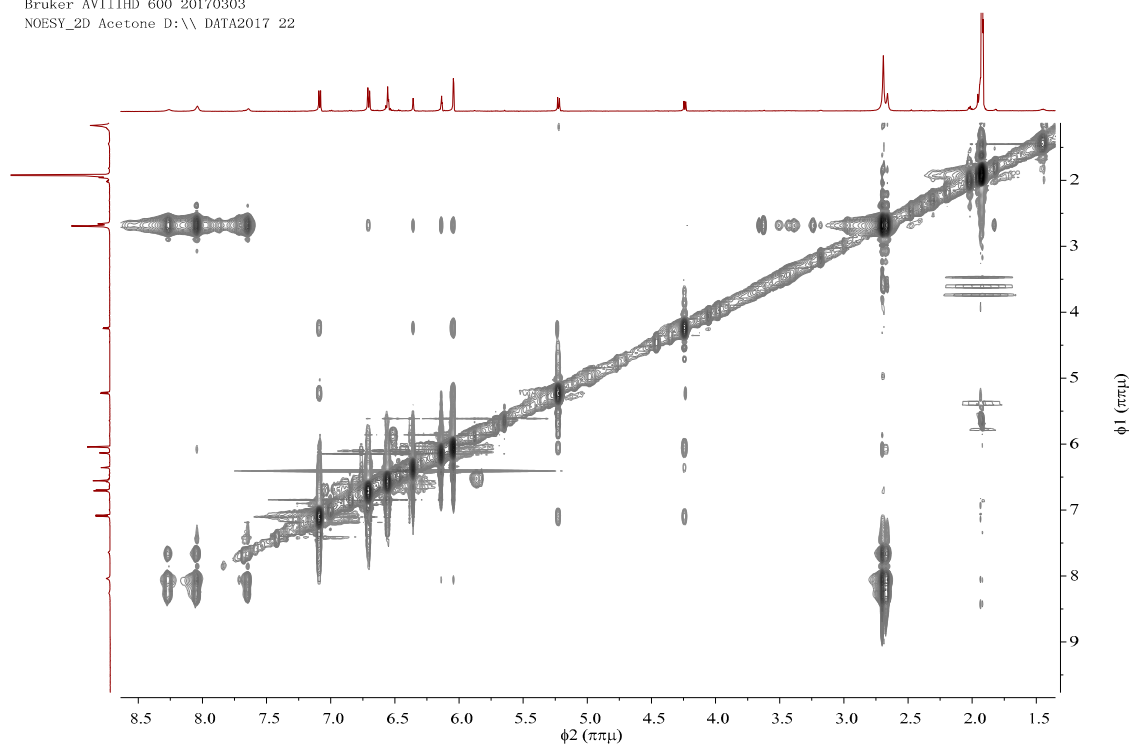

## S26. COSY spectrum of compound **5** in CD<sub>3</sub>COCD<sub>3</sub>.

PV-3  
 Bruker AVIIIHD 600  
 COSY\_CD3OD

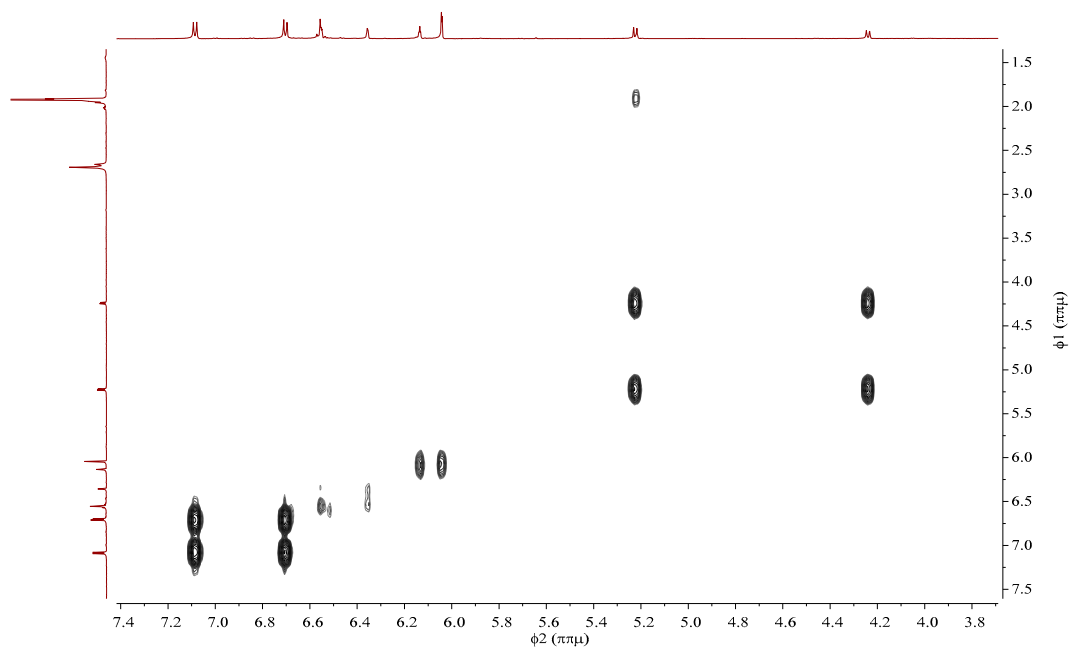

S27. HRESIMS spectrum of compound **5**.

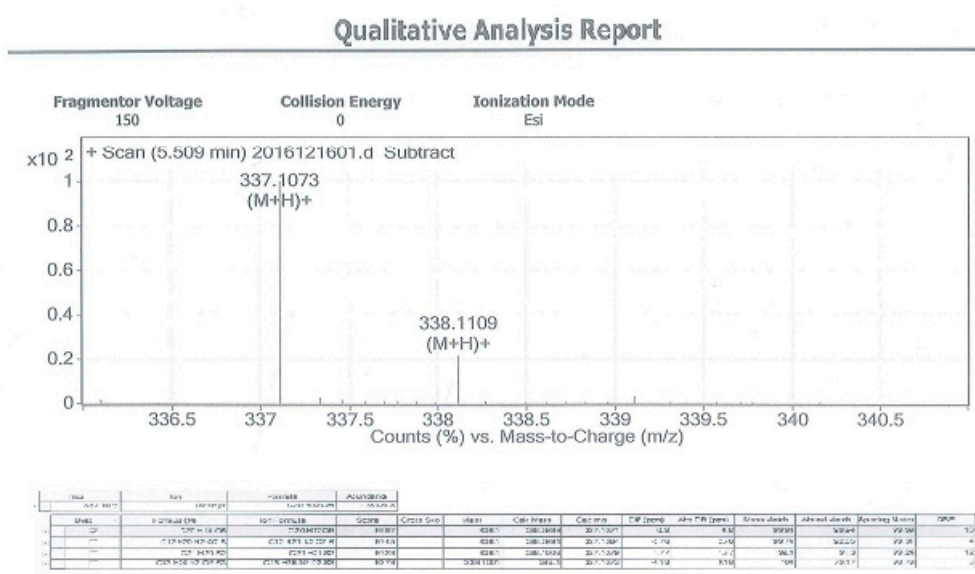

S28. UV spectrum of compound **5** in CH<sub>3</sub>OH.

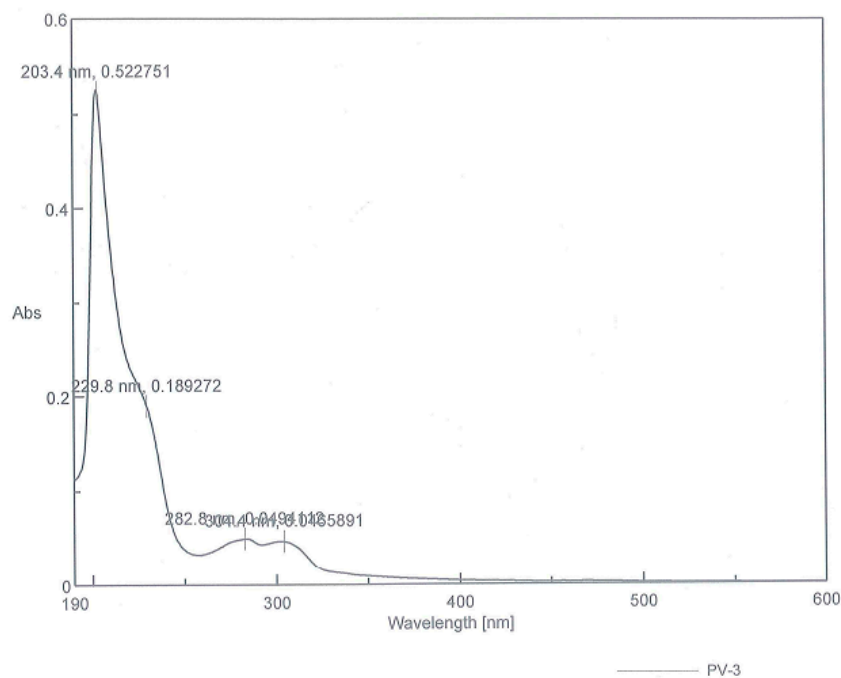

S29. IR spectrum of compound **5**.

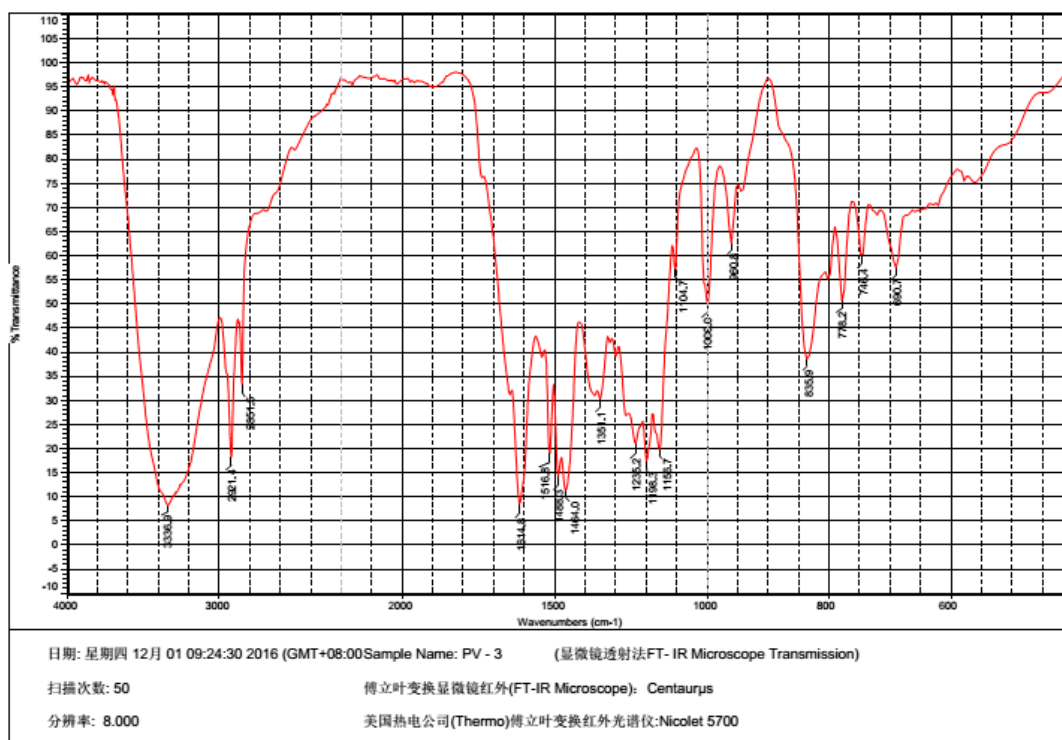

S30. HPLC chromatogram of biotransformation products of **1** and **2**.

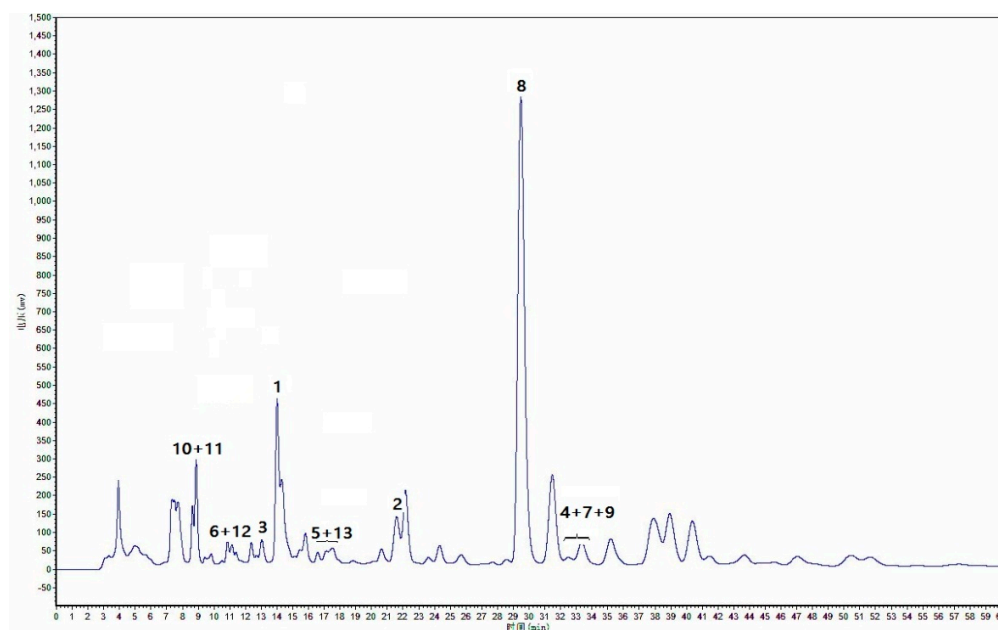

Analysis of biotransformation products of **1** and **2** catalyzed by HRP/H<sub>2</sub>O<sub>2</sub>.  
(40% CH<sub>3</sub>CN/H<sub>2</sub>O,  $\lambda$  = 280 nm, 2 mL/min, YMC column packed with C18, 250 mm × 10 mm)
